# Supplementary material
Source: publisher figshare collection journal article supplement (https://gsajournals.figshare.com/articles/dataset/_/9600878)

**Figure S2**

**A**

wild-type

*him-3 (e1256)*

*htp-3 (y428)*

*rec-8 (ok978)*

GFP::COSA-1

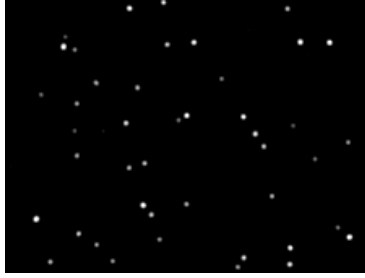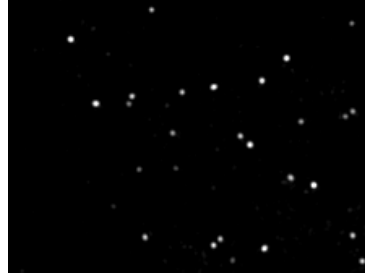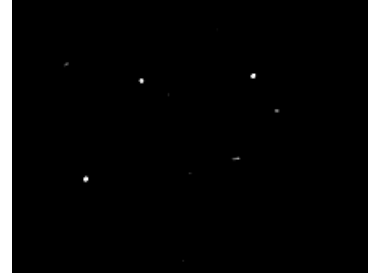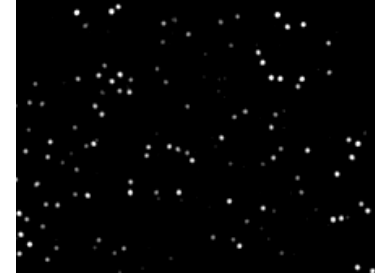

MSH-5

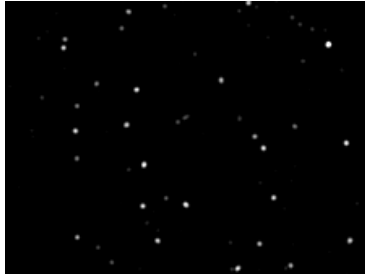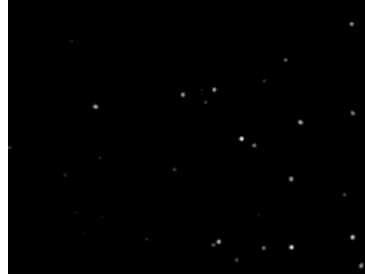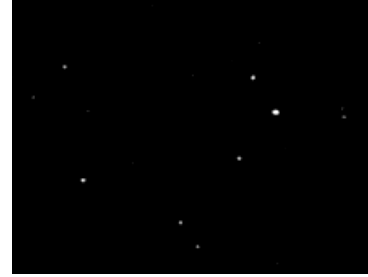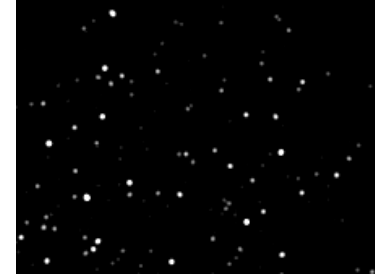

Late Pachytene

GFP::COSA-1  
MSH-5  
DAPI

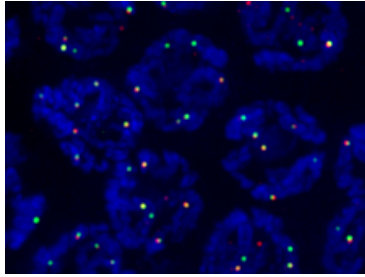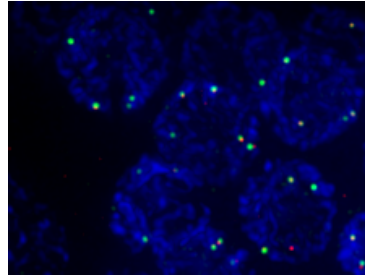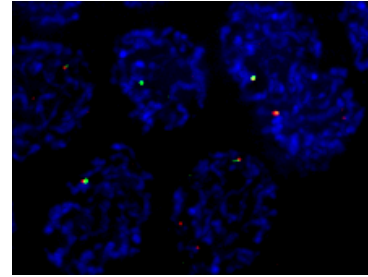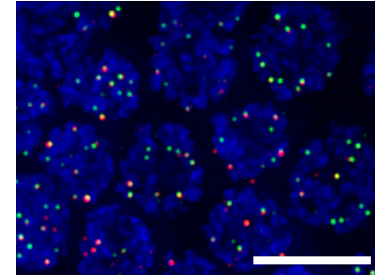

**B**

wild-type

*rec-8 (ok978)*

GFP::COSA-1  
ZHP-3

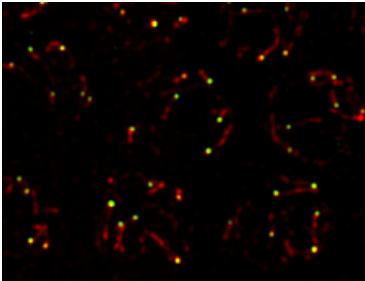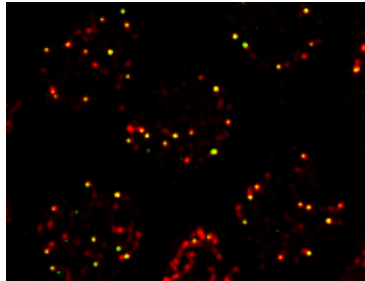

Late Pachytene

GFP::COSA-1  
ZHP-3  
DAPI

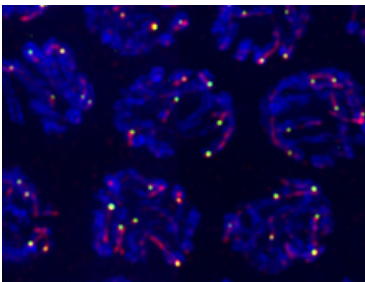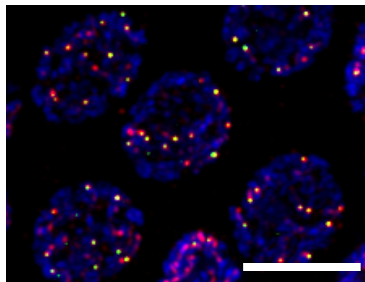

Supplement: Supplementary file 6 [file 2]
