# Supplementary material
Source: publisher figshare collection journal article supplement (https://gsajournals.figshare.com/articles/dataset/_/9600878)
Supplement: Supplementary file 5 [file 2]

**A**

**RAD-51 DAPI**

**RAD-51**

**DAPI**

wild-type

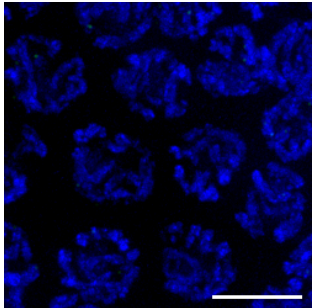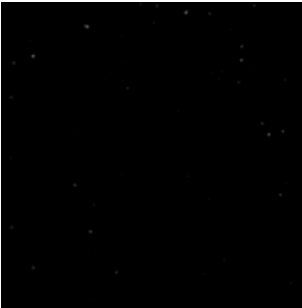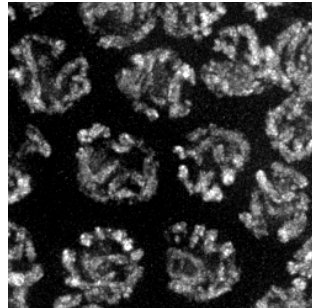

*syp-2 (ok307)*

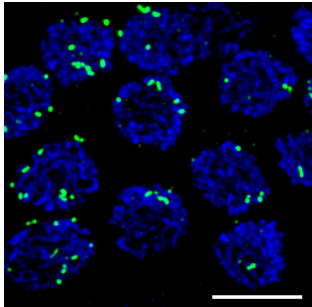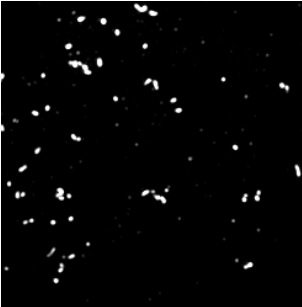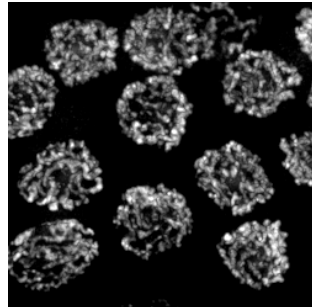

*rec-8; syp-2*

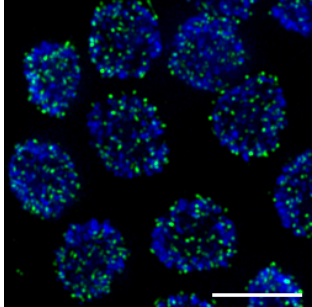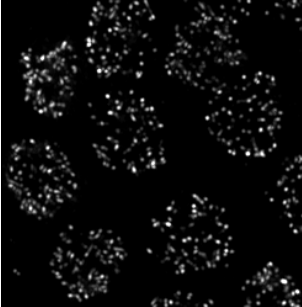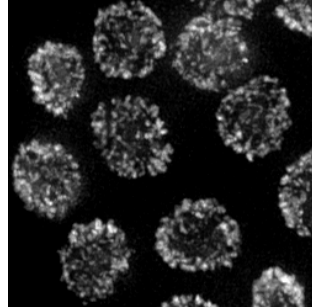

Late Pachytene

**B**

**RAD-51 DAPI**

**RAD-51**

**DAPI**

wild-type

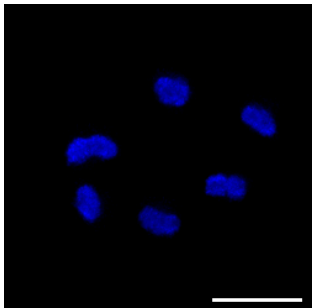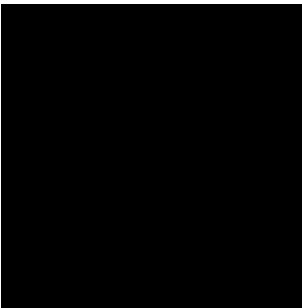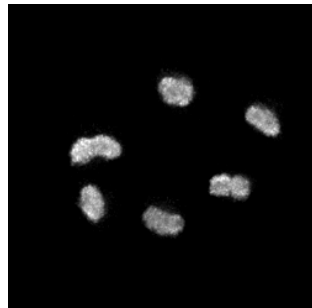

*syp-2 (ok307)*

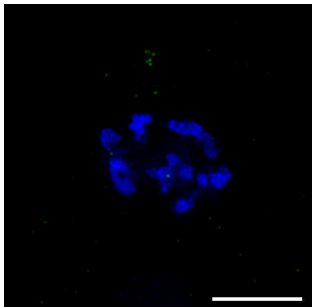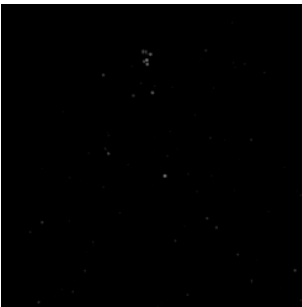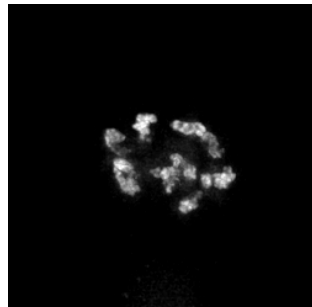

*rec-8; syp-2*

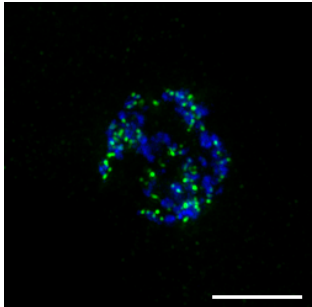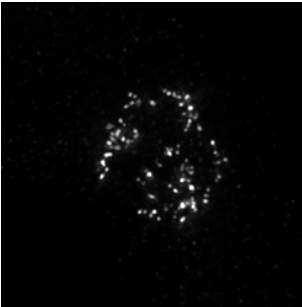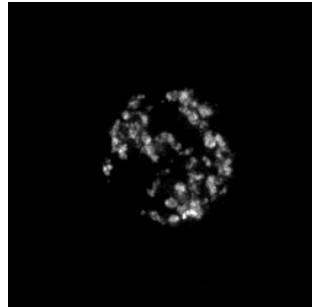

Diakinesis
