# Supplementary material
Source: publisher figshare collection journal article supplement (https://gsajournals.figshare.com/articles/dataset/_/9600878)
Supplement: Supplementary file 7 [file 2]

**Table S1: GFP::COSA-1 foci counts per nucleus in each genotype during late pachytene**

[illegible]
